# Supplementary material
Source: publisher site journal article supplement (https://www.dovepress.com/get_supplementary_file.php?f=supplementary_file_68909_1.pdf)
Supplement: Supplementary file 1 [file get_supplementary_file.php]

Table S1: The experimentally measured LogP values (MLogP) of 154 drugs vs. the in-silico calculations of LogP with the different methods

| Drug                           | MLogP<br>(BioLoom<br>5.0) | CLogP<br>(BioLoom<br>5.0) | CLogP<br>(ChemDraw<br>Ultra 8.0) | ALogP<br>(MOE<br>2004.03) | KLogP<br>molecular<br>formula |
|--------------------------------|---------------------------|---------------------------|----------------------------------|---------------------------|-------------------------------|
| abacavir sulfate               | 1.22                      | 0.81                      | 0.58                             | 1.09                      | 0.99                          |
| acetaminophen                  | 0.51                      | 0.49                      | 0.49                             | 1.35                      | 0.7                           |
| acetazolamide                  | -0.26                     | -0.98                     | -1.13                            | -0.86                     | -1.58                         |
| acetylsalicylic acid           | 1.19                      | 1.02                      | 1.02                             | 1.31                      | 0.36                          |
| acyclovir                      | -1.56                     | -2.42                     | -2.42                            | -1.46                     | -1.03                         |
| albendazole                    | 2.85                      | 3.46                      | 3.46                             | 3.24                      | 1.06                          |
| allopurinol                    | -0.55                     | -0.83                     | 0.63                             | 0.06                      | -0.51                         |
| alprazolam                     | 2.12                      | 2.55                      | 2.21                             | 3.58                      | 3.5                           |
| amiloride<br>hydrochloride     | 0.1                       | 0.11                      | 0.11                             | -1.08                     | -0.58                         |
| amisulpride                    | 1.1                       | 1.8                       | 1.8                              | 1.29                      | 1.32                          |
| amitriptyline<br>hydrochloride | 4.92                      | 4.85                      | 4.85                             | 4.17                      | 4.47                          |
| amlodipine besylate            | 3.3                       | 3.43                      | 3.43                             | 2.27                      | 2.54                          |
| amoxicillin                    | -1.99                     | -1.87                     | -1.87                            | 0.02                      | 0.67                          |
| amphetamine<br>(mixed salt)    | 1.76                      | 1.74                      | 1.29                             | 1.58                      | 1.82                          |
| artemether                     | 2.86                      | 3.05                      | 3.05                             | 2.84                      | 1.53                          |
| ascorbic acid                  | -1.64                     | -1.76                     | -1.76                            | -1.41                     | -1.28                         |
| atenolol                       | 0.16                      | -0.11                     | -0.11                            | 0.45                      | 1.33                          |
| atropine sulfate               | 1.83                      | 1.3                       | 1.3                              | 1.93                      | 2.38                          |
| azathioprine                   | 0.1                       | 0.11                      | 0.51                             | 0.82                      | -0.91                         |
| azithromycin<br>hydrate        | 4.02                      | 2.64                      | na                               | 1.9                       | 2.88                          |
| azulene sulfonate<br>sodium    | 3.2                       | 3.32                      | 2.95                             | 2.79                      | 2.42                          |

|                     |       |       |       |       |       |
|---------------------|-------|-------|-------|-------|-------|
| benznidazole        | 0.91  | 0.9   | 0.9   | 0.57  | 0.26  |
| biperiden           |       |       |       |       |       |
| hydrochloride       | 4.25  | 4.94  | 4.94  | 3.96  | 4.23  |
| bisoprolol fumarate | 1.87  | 1.83  | 1.92  | 2.37  | 2.13  |
| brotizolam          | 2.79  | 2.71  | 2.36  | 4.4   | 2.79  |
| captopril           | 0.9   | 0.89  | 0.89  | 0.63  | 0.5   |
| carbamazepine       | 2.19  | 2.38  | 2.38  | 3.39  | 2.54  |
| carvedilol          | 4.11  | 4.04  | 4.04  | 3.74  | 3.32  |
| cefaclor            | -1.79 | -1.64 | -1.64 | 0.62  | 1.55  |
| ceftazidime sodium  | -0.6  | -1.34 | -1.34 | -0.73 | -0.74 |
| cefroxadine         | -2.27 | -2.15 | -1.95 | -0.21 | 0.67  |
| cefuroxime axetil   | 0.26  | 0.23  | 0.23  | -0.54 | -0.99 |
| cetirizine          |       |       |       |       |       |
| hydrochloride       | 1.7   | 2.08  | 2.08  | 3.15  | 3.69  |
| chloramphenicol     | 1.14  | 1.28  | 1.28  | 0.37  | 1.05  |
| chloroquine         |       |       |       |       |       |
| phosphate           | 4.63  | 5.06  | 5.06  | 4.81  | 3.98  |
| chlorpheniramine    |       |       |       |       |       |
| maleate             | 3.17  | 3.15  | 3.15  | 3.82  | 3.85  |
| chlorpromazine      |       |       |       |       |       |
| hydrochloride       | 5.35  | 5.3   | 5.8   | 4.89  | 4.14  |
| cimetidine          | 0.4   | 0.38  | 0.35  | 0.6   | 0.51  |
| ciprofloxacin       |       |       |       |       |       |
| hydrochloride       | -1.08 | -0.73 | -1.15 | 1.37  | 1.67  |
| citalopram          |       |       |       |       |       |
| hydrobromide        | 3.41  | 3.13  | 3.13  | 3.67  | 3.59  |
| clarithromycin      | 3.16  | 2.37  | na    | 2.44  | 2.76  |
| clofazimine         | 7.48  | 7.7   | 7.5   | 7.96  | 6.56  |
| clomipramine        |       |       |       |       |       |
| hydrochloride       | 5.32  | 5.92  | 5.92  | 4.53  | 4.56  |
| clonidine           |       |       |       |       |       |
| hydrochloride       | 1.43  | 1.43  | 1.43  | 2.23  | 2.52  |

|                      |       |       |       |       |       |
|----------------------|-------|-------|-------|-------|-------|
| cloxacillin sodium   | 2.43  | 2.52  | 2.52  | 2.55  | 2.06  |
| clozapine            | 3.32  | 3.71  | 4.1   | 3.72  | 3.71  |
| codeine phosphate    | 1.14  | 0.98  | 0.98  | 1.5   | 2.64  |
| colchicine           | 1.3   | 1.2   | 1.2   | 2.59  | 2.24  |
| cyclophosphamide     | 0.63  | 0.8   | 0.93  | 0.81  | 0.63  |
| dapsone              | 0.97  | 0.89  | 0.89  | 1.68  | 1.39  |
| dexamethasone        | 1.74  | 1.79  | 1.79  | 1.51  | 2.65  |
| diazepam             | 2.99  | 2.96  | na    | 3.15  | 3.43  |
| diclofenac sodium    | 4.75  | 4.73  | 4.73  | 4.36  | 3.47  |
| didanosine           | -1.24 | -1.92 | -1.92 | -1.56 | -0.49 |
| digoxin              | 1.67  | 1.42  | na    | 2.22  | 3.39  |
| diloxanide furoate   | 1.78  | 1.77  | 1.77  | 2.16  | 2.25  |
| diltiazem            |       |       |       |       |       |
| hydrochloride        | 2.8   | 3.65  | 3.65  | 3.37  | 2.87  |
| dl-methionine        | -1.87 | -1.73 | -1.73 | 0.15  | -0.01 |
| domperidone          |       |       |       |       |       |
| maleate              | 4.05  | 4.27  | 4.27  | 4.6   | 3.44  |
| doxifluridine        | -1.16 | -1.19 | -1.19 | -1.18 | -0.84 |
| doxycycline          |       |       |       |       |       |
| hydrochloride        | -0.02 | -0.5  | -0.51 | -0.35 | 1.03  |
| epinastine           |       |       |       |       |       |
| hydrochloride        | 3.1   | 3.01  | 3.51  | 2.47  | 2.9   |
| erythromycin         |       |       |       |       |       |
| ethylsuccinate       | 2.54  | 1.61  | na    | 1.79  | 2.53  |
| escitalopram oxalate | 3.41  | 3.13  | 3.13  | 3.81  | 3.61  |
| ethinyl estradiol    | 3.67  | 3.86  | 3.86  | 3.61  | 3.88  |
| ethosuximide         | 0.38  | 0.39  | 0.4   | 0.45  | 0.44  |
| famotidine           | -0.64 | 0.58  | -0.61 | -0.77 | -1.1  |
| finasteride          | 3.03  | 3.01  | 3.01  | 3.81  | 3.91  |
| fluconazole          | 0.5   | -0.44 | -0.44 | 0.74  | 0.57  |

|                      |       |       |       |       |       |
|----------------------|-------|-------|-------|-------|-------|
| fluoxetine           |       |       |       |       |       |
| hydrochloride        | 4.5   | 4.57  | 4.57  | 4.44  | 3     |
| flurbiprofen         | 4.16  | 3.75  | 3.75  | 3.68  | 2.61  |
| fluvastatin sodium   | 3.8   | 4.05  | 4.05  | 4.63  | 3.53  |
| furosemide           | 2.03  | 1.9   | 1.9   | 1.89  | 0.7   |
| glipizide            | 1.91  | 2.57  | 2.57  | 2.08  | 1.67  |
| glyceryl trinitrate  | 1.62  | 1.76  | na    | na    | na    |
| griseofulvin         | 2.18  | 2.05  | 1.91  | 2.81  | 2.03  |
| haloperidol          | 4.28  | 3.85  | 3.85  | 4.43  | 4.37  |
| hydralazine          |       |       |       |       |       |
| hydrochloride        | 1     | 1.17  | 1.02  | 0.92  | 0.66  |
| hydrochlorothiazide  | -0.07 | -0.36 | -0.37 | -0.35 | -0.34 |
| hydroxyzine          |       |       |       |       |       |
| pamoate              | 3.5   | 4     | 4     | 3.06  | 4.13  |
| ibuprofen            | 3.5   | 3.68  | 3.68  | 3.07  | 2.19  |
| indinavir sulfate    | 3.49  | 3.68  | 3.68  | 2.87  | 2.2   |
| isoniazid            | -0.7  | -0.67 | -0.67 | -0.31 | 0.04  |
| isosorbide dinitrate | 1.17  | 0.22  | na    | na    | na    |
| isotretinoin         | 6.3   | 6.74  | 6.74  | 5.6   | 3.86  |
| ketoprofen           | 3.12  | 2.76  | 2.76  | 3.11  | 2.5   |
| lamivudine           | -0.93 | -1.46 | -1.46 | -0.3  | -0.35 |
| levamisole           |       |       |       |       |       |
| hydrochloride        | 1.84  | 1.84  | 1.84  | 2.15  | 2.05  |
| levodopa             | -2.74 | -2.82 | -2.82 | 0.05  | 0.03  |
| levofloxacin         | -0.39 | -0.51 | -0.88 | 1.6   | 1.46  |
| levosulpiride        | 1.23  | 1.11  | 1.11  | 0.56  | 0.85  |
| linezolid            | 0.5   | 0.17  | 0.53  | 1.12  | 0.96  |
| loratadine           | 5.2   | 5.05  | 5.05  | 4.89  | 4.4   |
| lorazepam            | 2.39  | 2.37  | 2.37  | 3.1   | 3.41  |
| lovastatin           | 4.26  | 4.08  | 4.08  | 4.2   | 3.44  |
| mebendazole          |       |       |       |       |       |
| (chewable)           | 2.83  | 3.08  | 3.08  | 2.97  | 1.56  |

|                                                     |       |       |       |       |       |
|-----------------------------------------------------|-------|-------|-------|-------|-------|
| methylphenidate                                     |       |       |       |       |       |
| hydrochloride                                       | 1.8   | 2.56  | 2.56  | 2.09  | 2.12  |
| metoclopramide                                      |       |       |       |       |       |
| hydrochloride                                       | 2.62  | 2.23  | 2.23  | 2     | 2.12  |
| metoprolol tartrate                                 | 1.88  | 1.49  | 1.49  | 1.61  | 1.87  |
| metronidazole                                       | -0.02 | -0.46 | -0.46 | -0.45 | -0.89 |
| morphine sulfate                                    | 0.76  | 0.57  | 0.57  | 1.2   | 2.4   |
| nabumetone                                          | 3.08  | 2.98  | 2.98  | 3.37  | 2.7   |
| nalidixic acid                                      | 1.59  | 1.02  | 1.34  | 1.38  | 0.9   |
| nevirapine                                          | 1.81  | 2.65  | 2.42  | 1.68  | 1.89  |
| niacin                                              | 0.66  | 0.8   | 0.8   | 0.78  | 0.23  |
| nicardipine                                         |       |       |       |       |       |
| hydrochloride                                       | 4.96  | 5.23  | 5.23  | 3.14  | 2.57  |
| nicotinamide                                        | -0.34 | -0.21 | -0.21 | 0.18  | 0.36  |
| nifedipine                                          | 3.27  | 3.12  | 3.13  | 1.64  | 0.73  |
| nimesulide                                          | 2.6   | 3.21  | 3.21  | 2.22  | 0.28  |
| nitrofurantoin                                      | -0.47 | -0.47 | -0.47 | -0.46 | -0.19 |
| nizatidine                                          | -0.2  | -0.16 | -0.2  | 0.91  | 0.43  |
| norethindrone<br>(norethisterone)                   | 2.97  | 2.97  | 2.78  | 3.49  | 3.87  |
| olanzapine                                          | 3     | 3.01  | 3.39  | 3.44  | 2.85  |
| oxycodone                                           |       |       |       |       |       |
| hydrochloride                                       | 0.21  | -0.04 | -0.04 | 1.05  | 2.19  |
| penicillamine                                       | -1.78 | -1.73 | -1.73 | 0.11  | -0.01 |
| phenobarbital                                       | 1.47  | 1.37  | 1.37  | 0.7   | 0.9   |
| phenoxymethylpenicillin<br>(penicillin v potassium) | 2.09  | 1.94  | 1.94  | 0.7   | 0.99  |
| phenytoin<br>(chewable)                             | 2.26  | 2.08  | 2.09  | 1.77  | 2.09  |
| phenytoin sodium                                    | 2.26  | 2.08  | 2.09  | 1.77  | 2.09  |
| pravastatin sodium                                  | 2.18  | 2.05  | 2.05  | 2.44  | 2.29  |

|                     |       |       |       |       |       |
|---------------------|-------|-------|-------|-------|-------|
| prednisolone        | 1.42  | 1.42  | 1.42  | 1.56  | 2.75  |
| proguanil           |       |       |       |       |       |
| hydrochloride       | 2.53  | 2.53  | na    | 2.21  | 1.69  |
| promethazine        |       |       |       |       |       |
| hydrochloride       | 4.81  | 4.4   | 4.9   | 4.24  | 3.48  |
| propranolol         |       |       |       |       |       |
| hydrochloride       | 2.98  | 2.75  | 2.75  | 2.58  | 2.6   |
| pseudoephedrine     |       |       |       |       |       |
| hydrochloride       | 0.93  | 0.89  | 0.89  | 1.33  | 1.61  |
| pyrazinamide        | -0.6  | -0.68 | -0.68 | -0.42 | -0.2  |
| pyridoxine          |       |       |       |       |       |
| hydrochloride       | -0.72 | -0.35 | -0.8  | 0.08  | 0.23  |
| pyrimethamine       | 2.69  | 3     | 3     | 2.52  | 2.27  |
| quinine sulfate     | 2.64  | 2.79  | 2.79  | 3.17  | 3.25  |
| ranitidine          |       |       |       |       |       |
| hydrochloride       | 0.27  | 0.67  | 0.63  | 1.05  | 0.49  |
| reserpine           | 3.72  | 3.86  | 3.86  | 3.54  | 3.2   |
| retinol palmitate   | 5.68  | 6.4   | na    | 5.51  | 4.29  |
| ribavirin           | -1.85 | -2.85 | -2.85 | -3.01 | -1.62 |
| riboflavin          | -1.46 | -0.73 | -0.73 | -1.08 | 0.09  |
| risperidone         | 3.04  | 2.71  | 2.71  | 4.36  | 3.24  |
| saquinavir mesylate | 4.7   | 4.73  | 4.73  | 3.09  | 4.9   |
| simvastatin         | 4.68  | 4.48  | 4.48  | 4.59  | 3.67  |
| spironolactone      | 2.26  | 2.84  | 2.25  | 4.85  | 3.96  |
| stavudine           | -0.64 | -0.49 | -0.73 | -0.28 | -0.05 |
| sulfadiazine        | -0.09 | 0.1   | 0.01  | 0.86  | 0.28  |
| sulfamethoxazole    | 0.89  | 0.56  | 0.56  | 1.37  | 0.14  |
| sumatriptan         |       |       |       |       |       |
| succinate           | 0.93  | 0.74  | 0.74  | 1.32  | 1.52  |
| tegafur             | -0.27 | -0.07 | -0.07 | 0.49  | -0.17 |
| terbinafine         |       |       |       |       |       |
| hydrochloride       | 6     | 5.96  | 5.96  | 4.88  | 4.71  |

|                       |       |       |       |      |       |
|-----------------------|-------|-------|-------|------|-------|
| theophylline          | -0.02 | -0.03 | -0.03 | 0.05 | -0.49 |
| tosufloxacin tosylate | -0.46 | -0.39 | 0.19  | 2.34 | 1.66  |
| tramadol              |       |       |       |      |       |
| hydrochloride         | 2.63  | 3.1   | 3.1   | 2.63 | 2.57  |
| trimethoprim          | 0.91  | 0.98  | 0.98  | 1.26 | 0.72  |
| ursodeoxycholic       |       |       |       |      |       |
| acid (ursodiol)       | 4.15  | 4.51  | 4.51  | 4.48 | 3.87  |
| valproate sodium      | 2.75  | 2.76  | 2.76  | 2.29 | 0.97  |
| valproic acid         | 2.75  | 2.76  | 2.76  | 2.29 | 0.97  |
| verapamil             |       |       |       |      |       |
| hydrochloride         | 3.97  | 4.47  | 4.47  | 5.09 | 3.98  |
| warfarin sodium       | 2.7   | 2.9   | 2.9   | 3.64 | 2.78  |
| zidovudine            | 0.05  | 0.04  | 0.04  | 0.23 | -1    |
